# Supplementary material for: Ni–Co hydroxide nanosheets on plasma-reduced Co-based metal–organic nanocages for electrocatalytic water oxidation
Source: Royal Society of Chemistry journal article supplement (doi:10.1039/c9ta00070d), 2019-01-01
Supplement: c9ta00070d1.pdf [file c9ta00070d1.pdf]

## **Ni-Co hydroxide nanosheets on plasma-reduced Co-based metal-organic nanocages for electrocatalytic water oxidation**

Wenxia Chen<sup>a</sup>, Yiwei Zhang<sup>a\*</sup>, Rong Huang<sup>a</sup>, Yuming Zhou<sup>a\*</sup>, Yangjin Wu<sup>a</sup>, Yingjie Hu<sup>b\*</sup>, and Kostya (Ken) Ostrikov<sup>c</sup>

<sup>a</sup>School of Chemistry and Chemical Engineering, Southeast University, Jiangsu Optoelectronic Functional Materials and Engineering Laboratory, Nanjing 211189, P. R. China.

<sup>b</sup>Key Laboratory of Advanced Functional Materials of Nanjing, Nanjing Xiaozhuang University, Nanjing 211171, China.

<sup>c</sup>School of Chemistry, Physics and Mechanical Engineering, Queensland University of Technology, Brisbane, QLD 4000, Australia.

\*Corresponding authors E-mail: [zhangchem@seu.edu.cn](mailto:zhangchem@seu.edu.cn), [ymzhou@seu.edu.cn](mailto:ymzhou@seu.edu.cn), [huyj113@qq.com](mailto:huyj113@qq.com).

Tel: +86 25 52090617; Fax: +86 25 52090617.

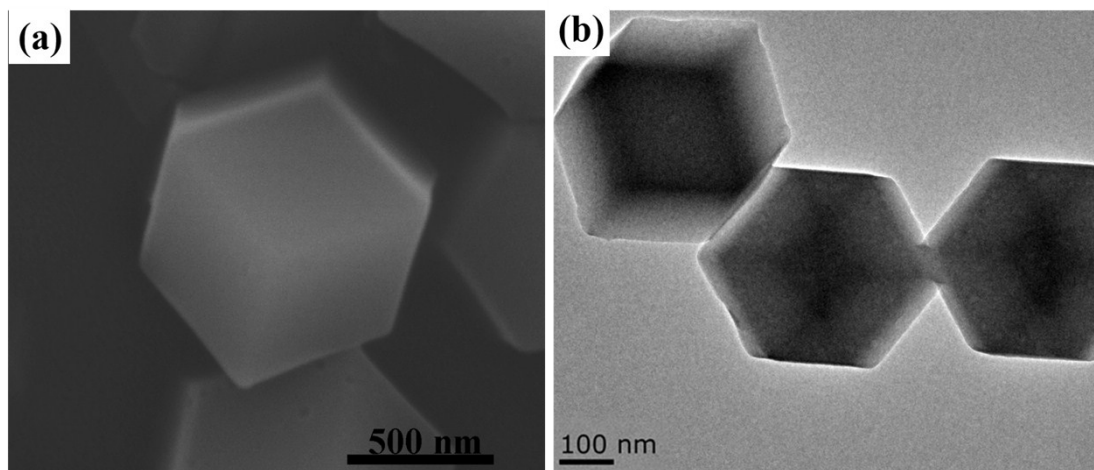

**Fig. S1** (a) SEM and (b) TEM images of pure ZIF-67.

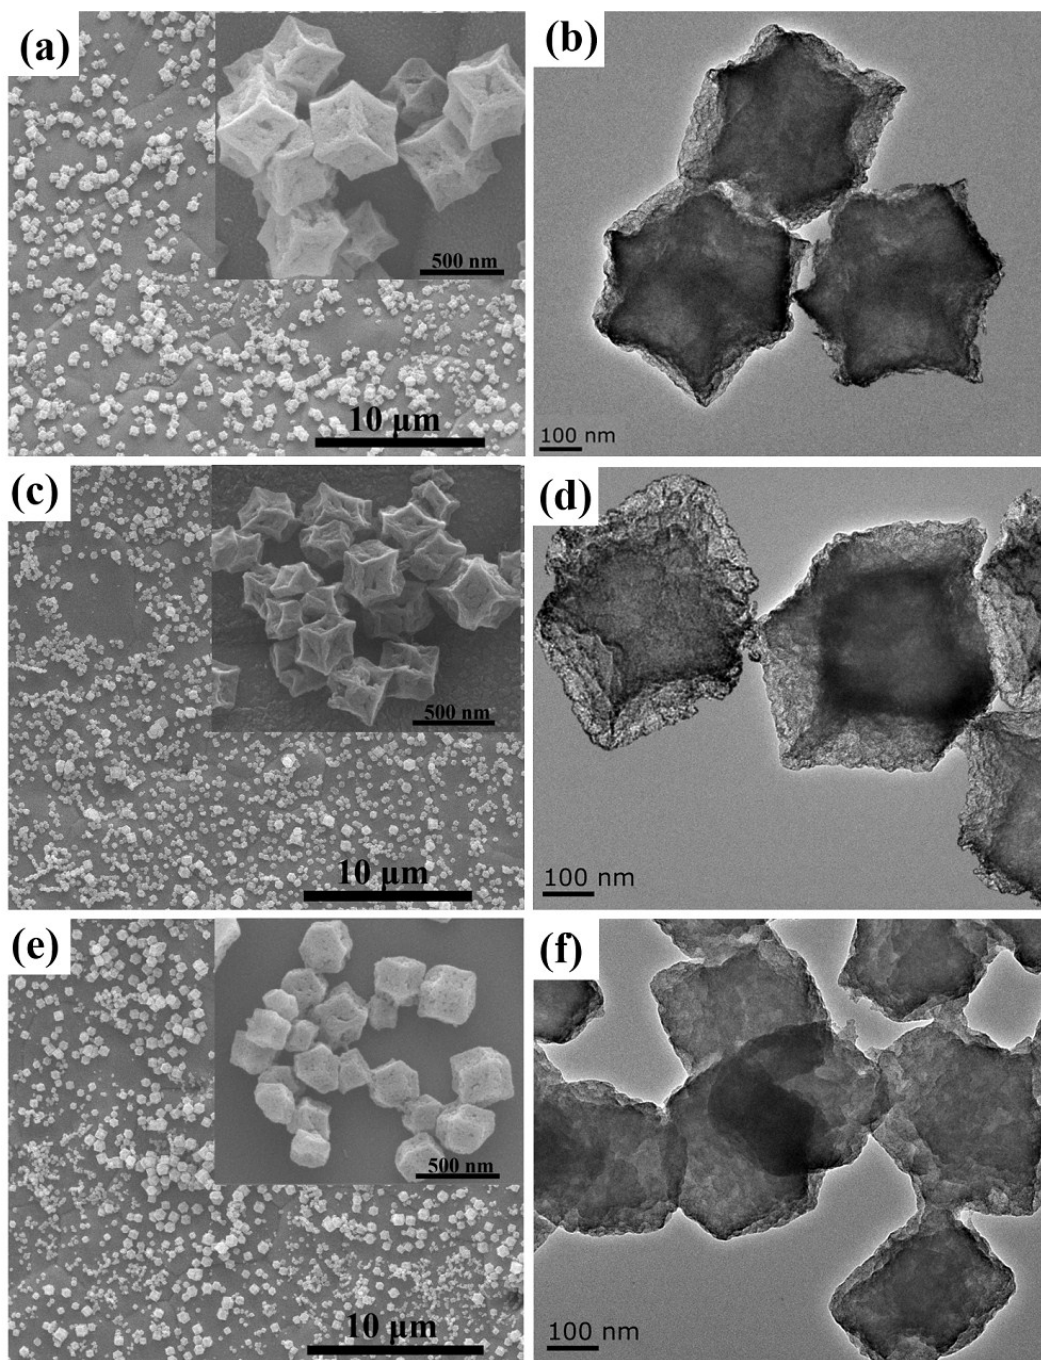

**Fig. S2** Preparation of ZIF-67-V<sub>0</sub>/NF: (a), (c) and (e) SEM (the inset shows the enlarged images and the scale bar is 500 nm) and (b), (d) and (f) TEM images of ZIF-67-V<sub>0</sub> treated by O<sub>2</sub>-Ar RF plasma in 120, 150 and 180W, respectively.

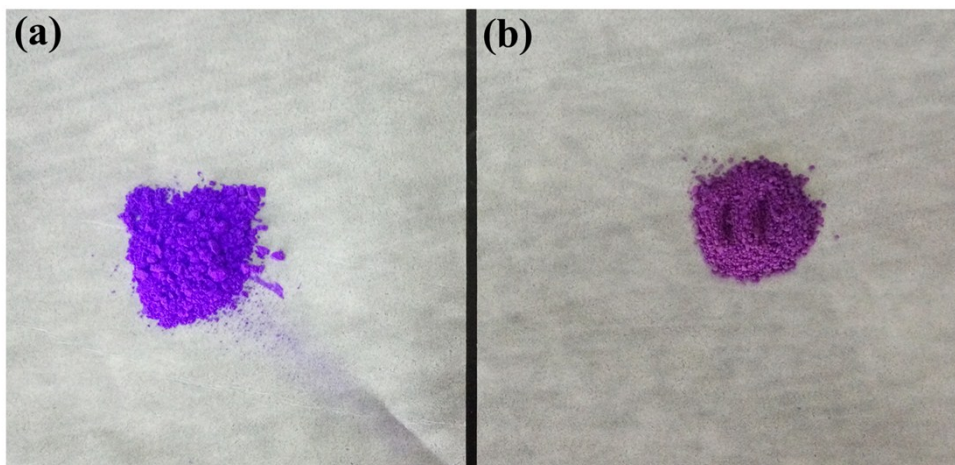

**Fig. S3** The optical images of (a) pure ZIF-67 and (b) ZIF-67-V<sub>o</sub> treated by O<sub>2</sub>-Ar RF plasma in 150W.

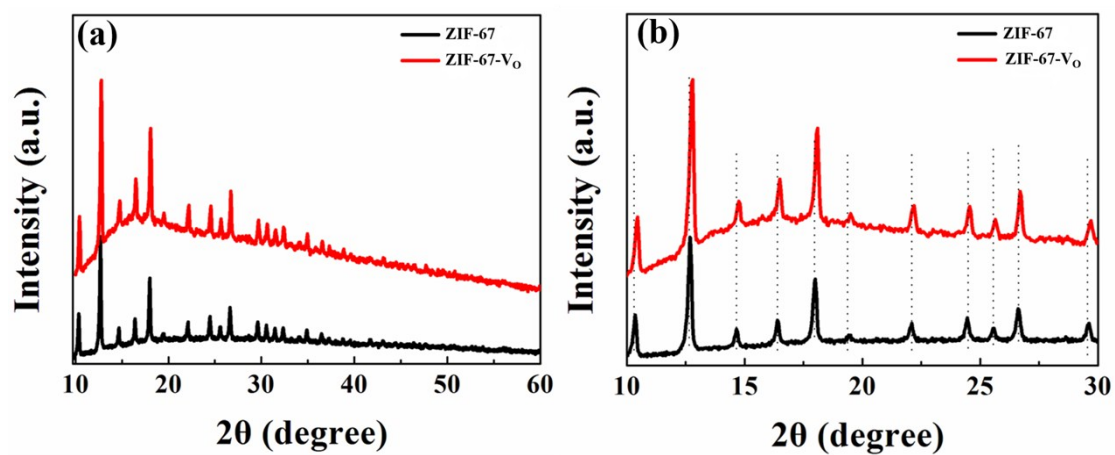

Fig. S4 (a) XRD patterns and (b) the enlarged XRD patterns images of the pure ZIF-67 and ZIF-67-V<sub>O</sub> powder.

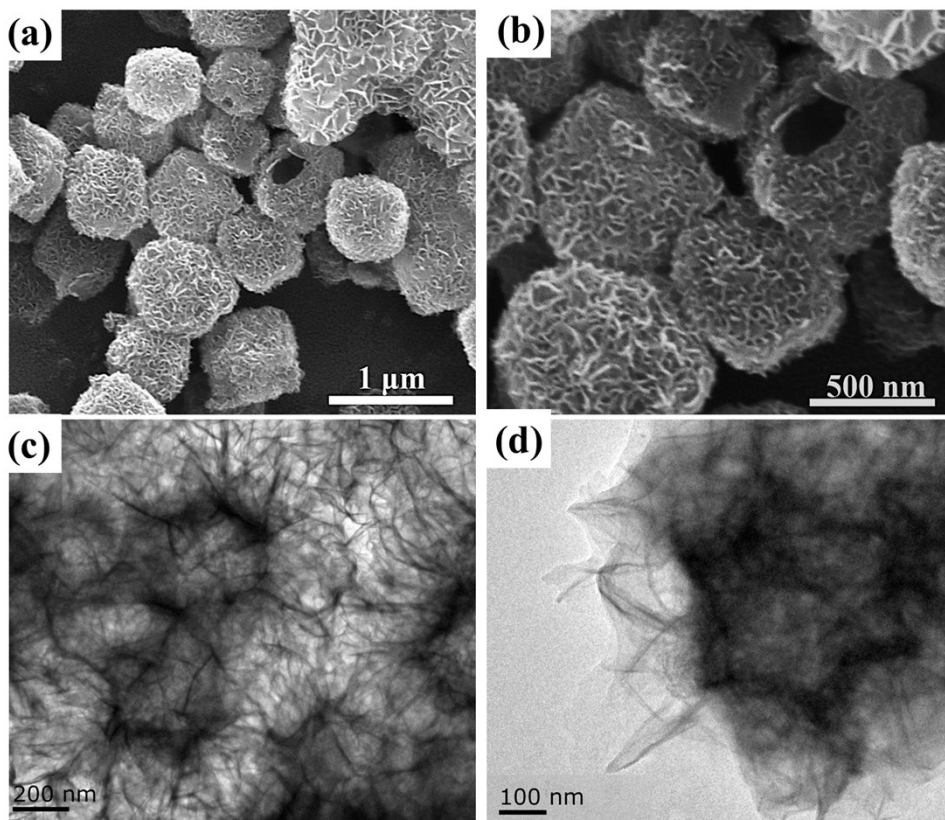

**Fig. S5** (a) and (b) SEM, (c) and (d) TEM images of the Ni LDH@ZIF-67-V<sub>O</sub>/NF.

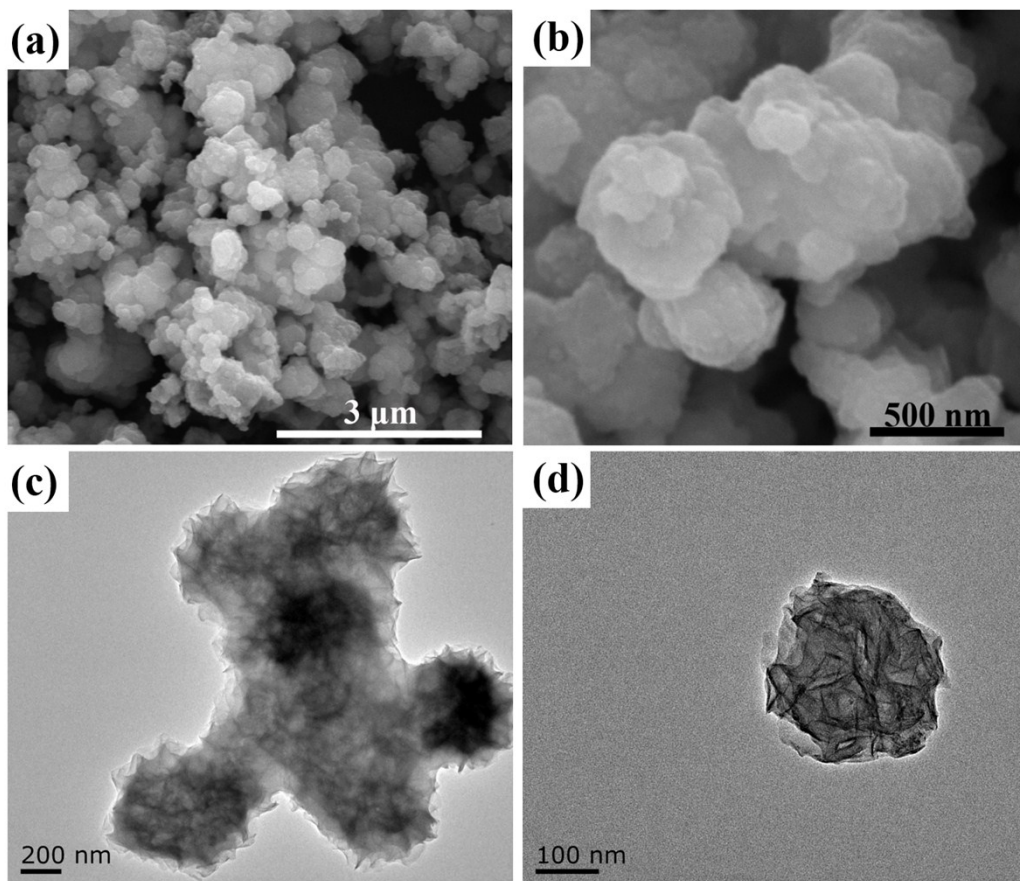

**Fig. S6** (a) and (b) SEM, (c) and (d) TEM images of the NiFe LDH@ZIF-67-V<sub>O</sub>/NF.

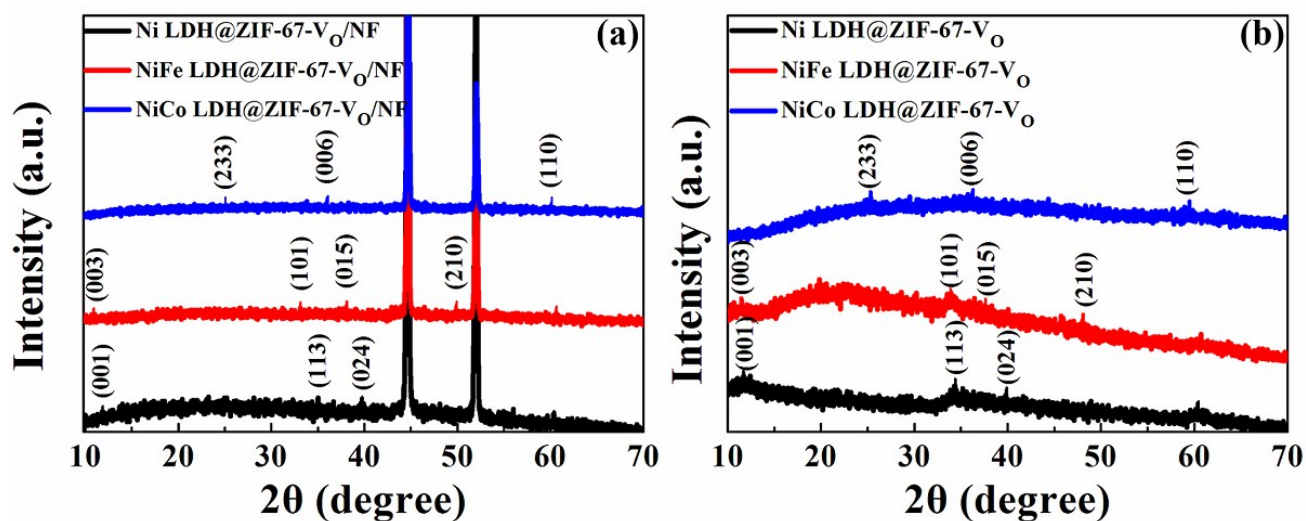

**Fig. S7** (a) The XRD patterns images of the Ni LDH@ZIF-67-V<sub>O</sub>/NF, NiFe LDH@ZIF-67-V<sub>O</sub>/NF, NiCo LDH@ZIF-67-V<sub>O</sub>/NF, and (b) the corresponding Ni LDH@ZIF-67-V<sub>O</sub>, NiFe LDH@ZIF-67-V<sub>O</sub>, NiCo LDH@ZIF-67-V<sub>O</sub> powder sample scraped from the substrate.



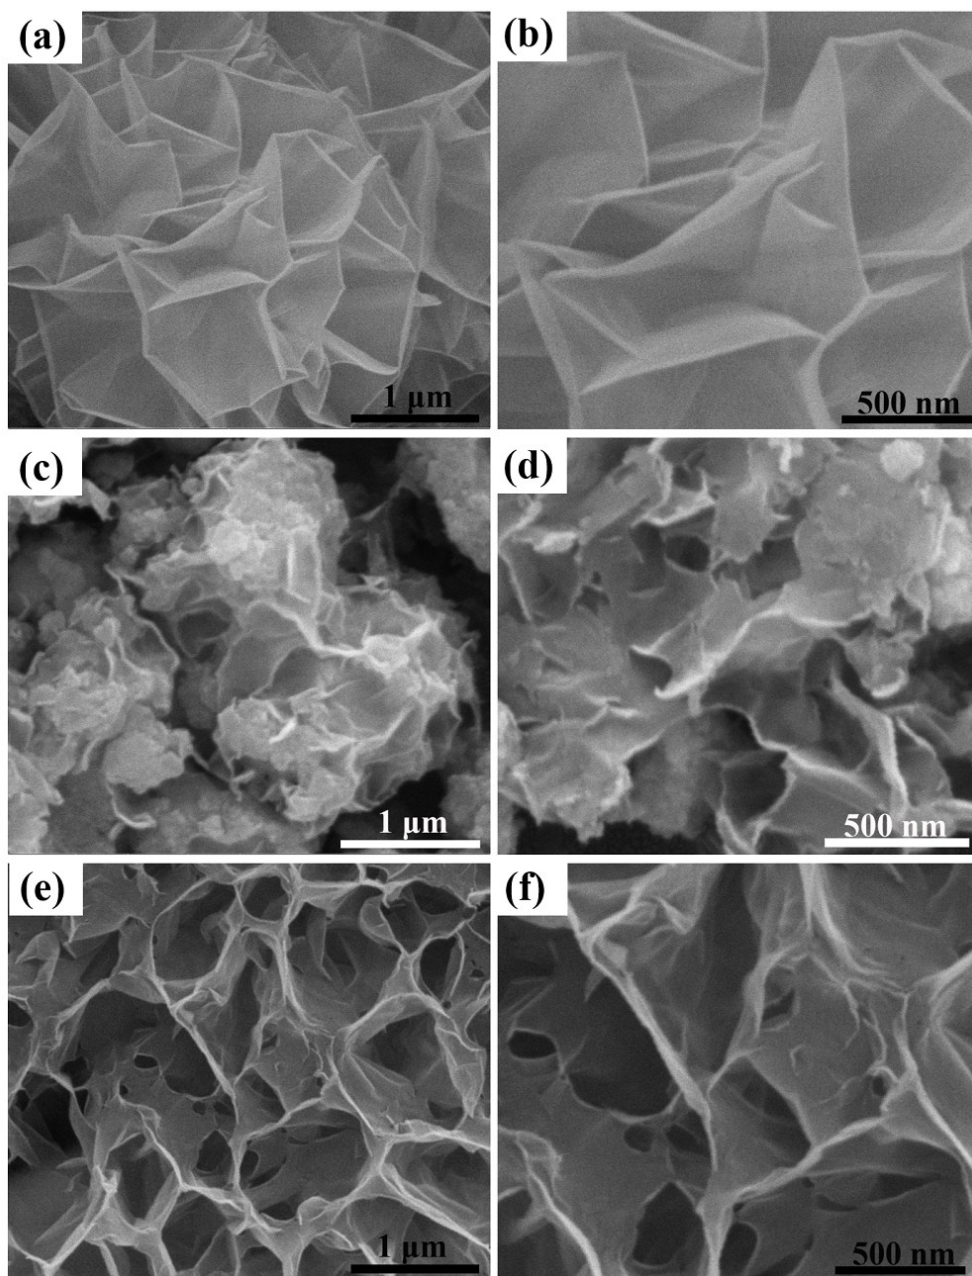

**Fig. S8** SEM images of (a) and (b) Ni LDH/NF, (c) and (d) NiFe LDH/NF, (e) and (f) NiCo LDH/NF.

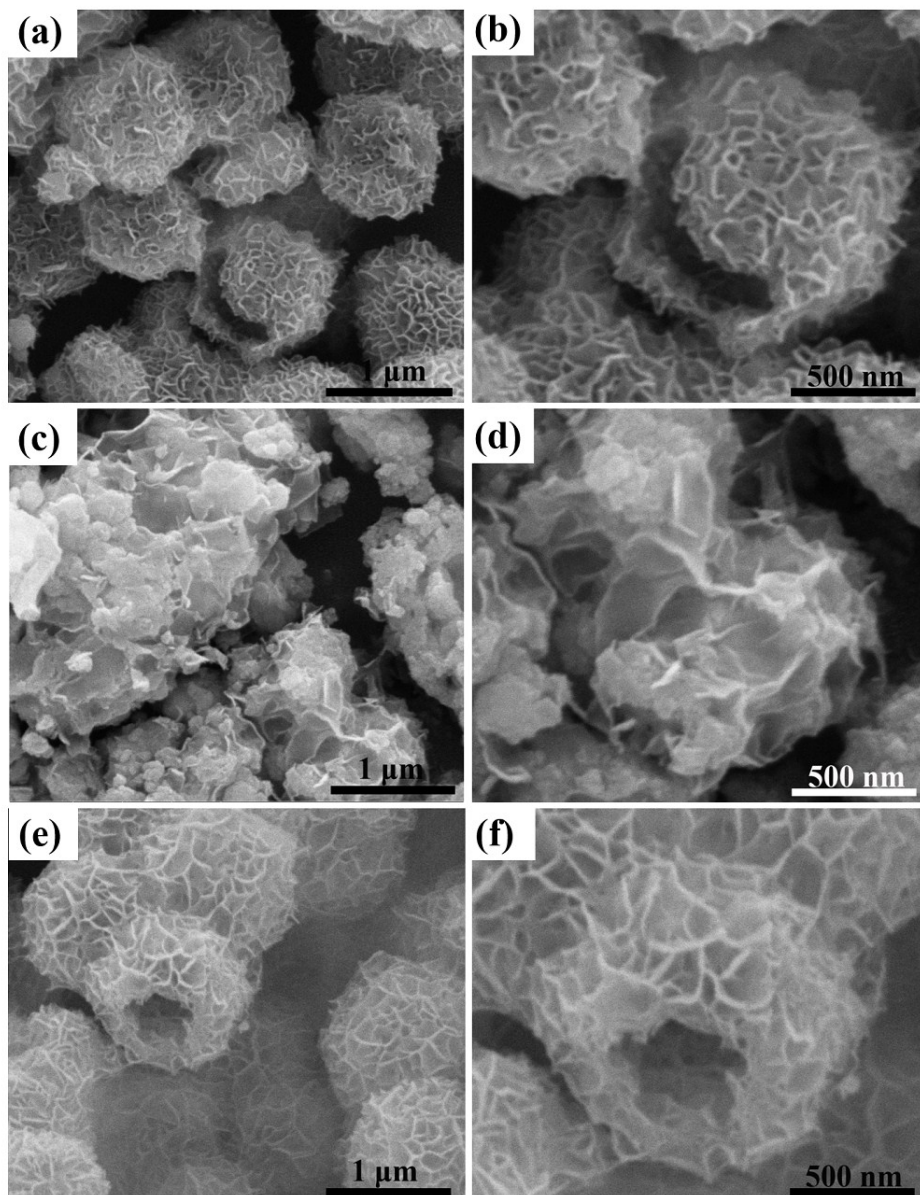

**Fig. S9** SEM images of (a) and (b) Ni LDH@ZIF-67/NF, (c) and (d) NiFe LDH@ZIF-67/NF, (e) and (f) NiCo LDH@ZIF-67/NF.

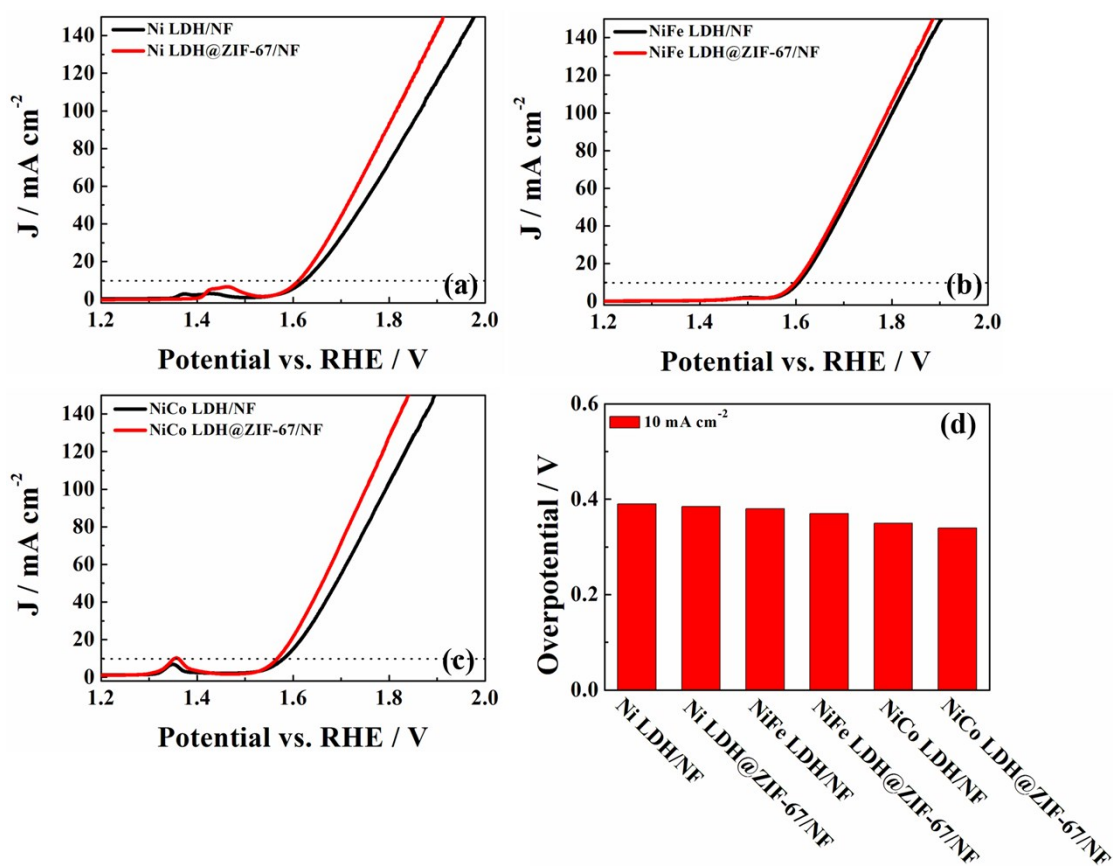

**Fig. S10** LSV curves of (a) Ni LDH/NF, Ni LDH@ZIF-67/NF, (b) NiFe LDH/NF, NiFe LDH@ZIF-67/NF, (c) NiCo LDH /NF and NiCo LDH@ZIF-67/NF for the OER, and (d) the corresponding overpotential at 10 mA cm<sup>-2</sup>.

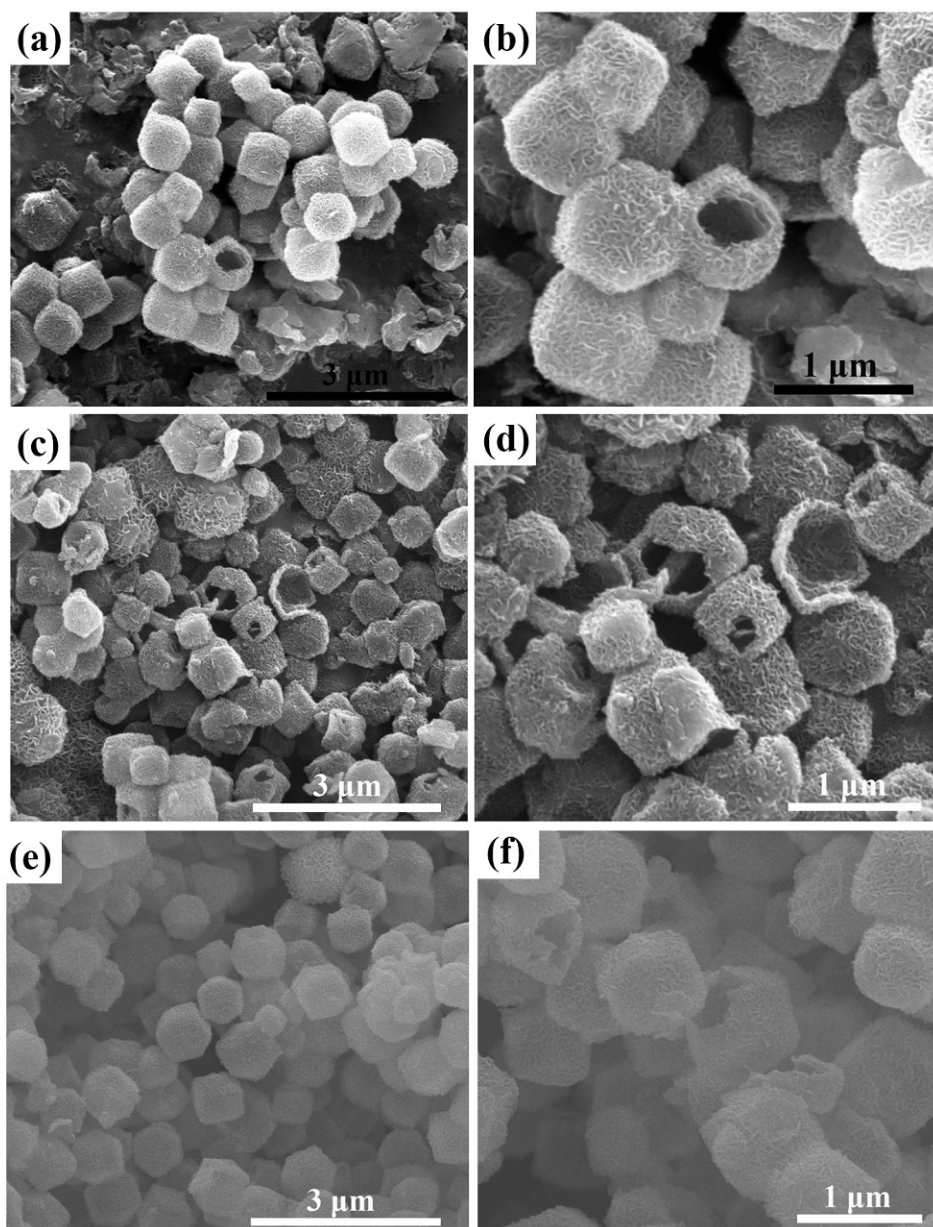

**Fig. S11** SEM images of the NiCo LDH@ZIF-67-V<sub>O</sub>/NF (Ni:Co=8:2), NiCo LDH@ZIF-67-V<sub>O</sub>/NF (Ni:Co=5:5) and Ni<sub>2</sub>Co LDH@ZIF-67-V<sub>O</sub>/NF (Ni:Co=3:7).

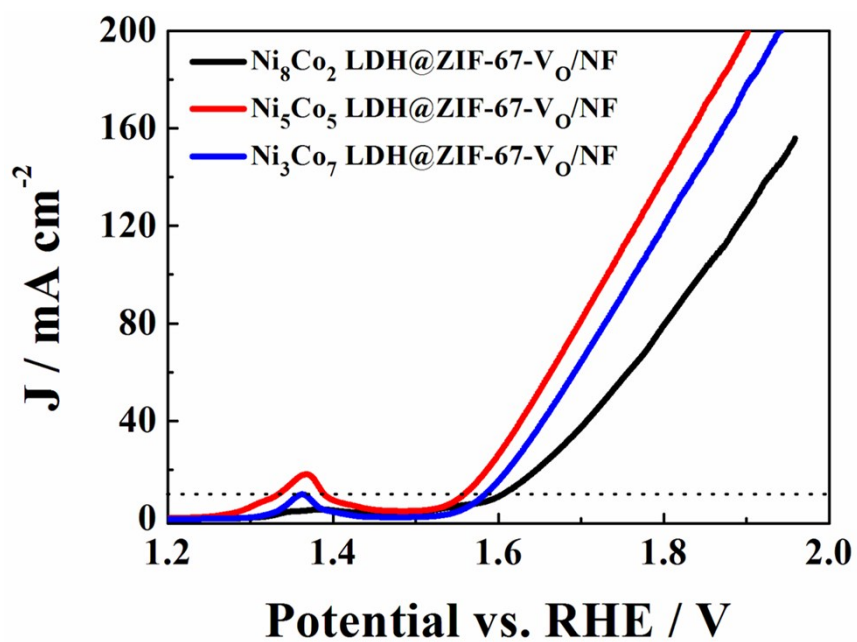

**Fig. S12** LSV curves of NiCo LDH@ZIF-67-V<sub>0</sub>/NF (Ni:Co=8:2), NiCo LDH@ZIF-67-V<sub>0</sub>/NF (Ni:Co=5:5) and NiCo LDH@ZIF-67-V<sub>0</sub>/NF (Ni:Co=3:7).

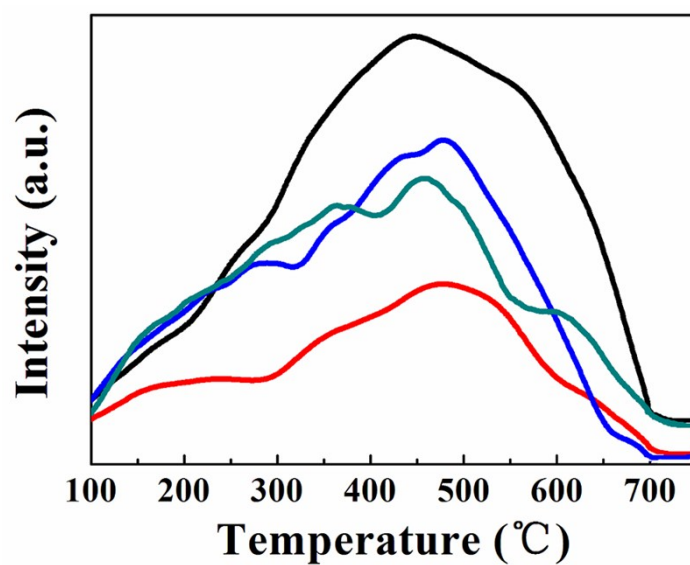

**Fig. S13** O<sub>2</sub>-TPD analysis of NiCo LDH@ZIF-67-V<sub>0</sub>/NF (black), NiFe LDH@ZIF-67-V<sub>0</sub>/NF (blue), NiCo LDH@ZIF-67/NF (green) and Ni LDH@ZIF-67-V<sub>0</sub>/NF (red), showing the O<sub>2</sub> desorption capabilities.

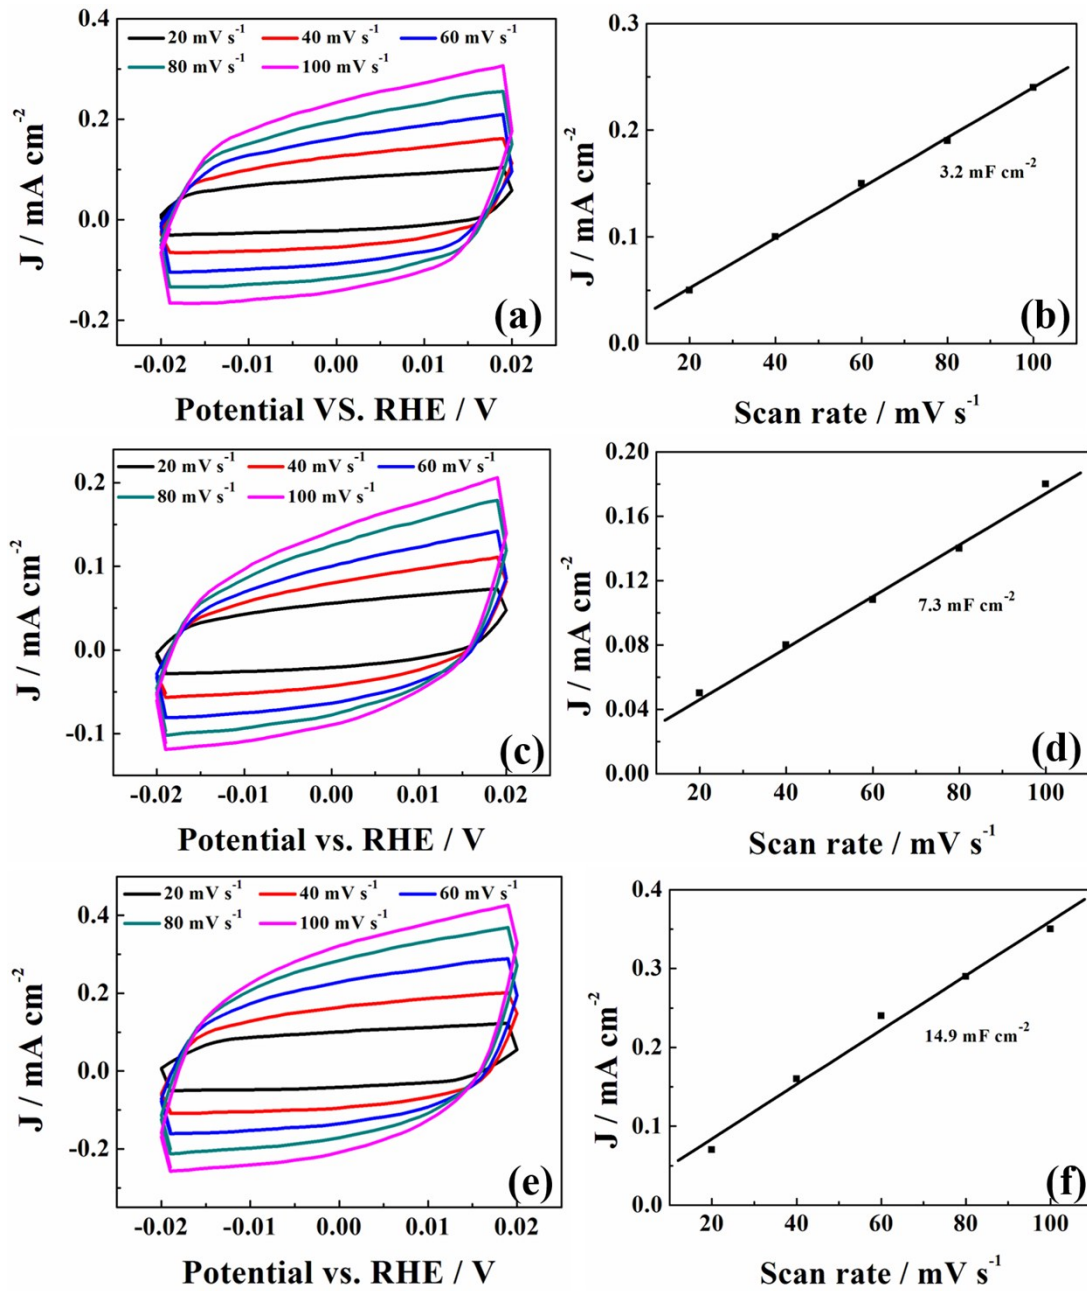

**Fig. S14** CV curves at various scan rates in the potential range -0.02~0.02 V vs. RHE for (a) Ni LDH@ZIF-67-V<sub>o</sub>/NF, (c) NiFe LDH@ZIF-67-V<sub>o</sub>/NF and (e) NiCo LDH@ZIF-67-V<sub>o</sub>/NF, and the double layer capacitances ( $C_{dl}$ ) of (b) Ni LDH@ZIF-67-V<sub>o</sub>/NF, (d) NiFe LDH@ZIF-67-V<sub>o</sub>/NF and (f) NiCo LDH@ZIF-67-V<sub>o</sub>/NF at the potential of 0 V vs. RHE, respectively.

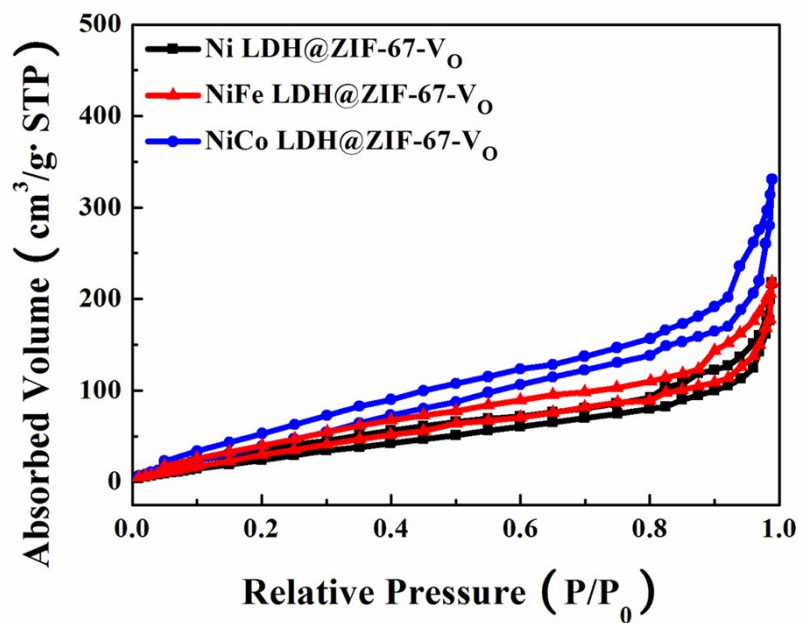

**Fig. S15** N<sub>2</sub> adsorption/desorption curve of Ni LDH@ZIF-67-V<sub>o</sub>, NiFe LDH@ZIF-67-V<sub>o</sub> and NiCo LDH@ZIF-67-V<sub>o</sub> powder sample scraped from the substrate at 77 K.



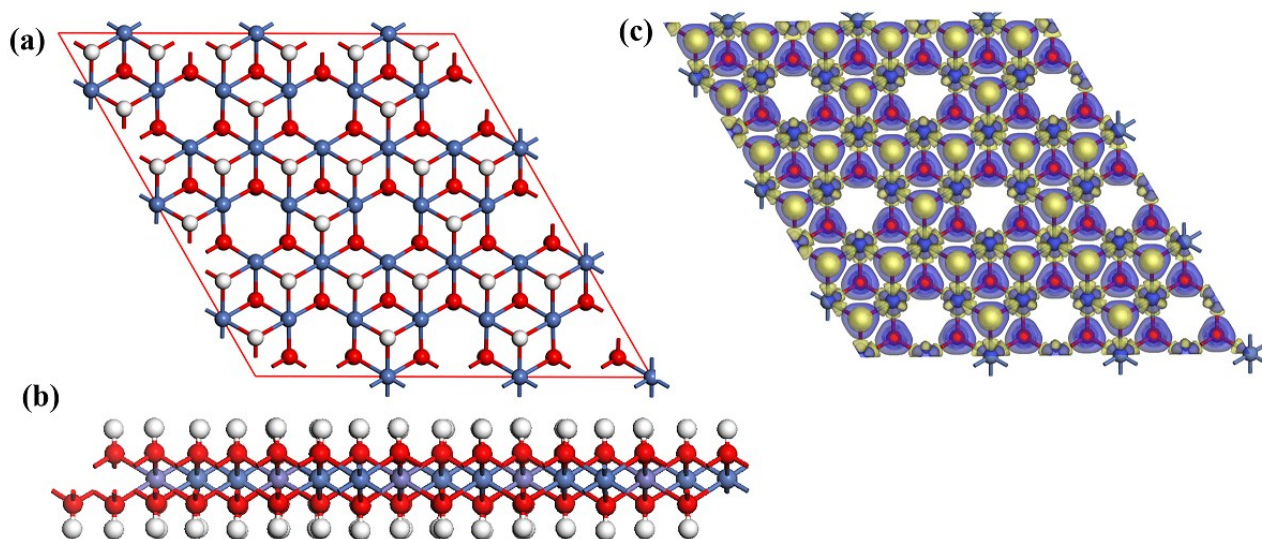

**Fig. S16** Atomic structure model and theoretical calculation analysis of the catalysts: (a) Top view and (b) side view of the model structure of Ni LDH-V<sub>O</sub>, (c) corresponding 3D charge distributions.

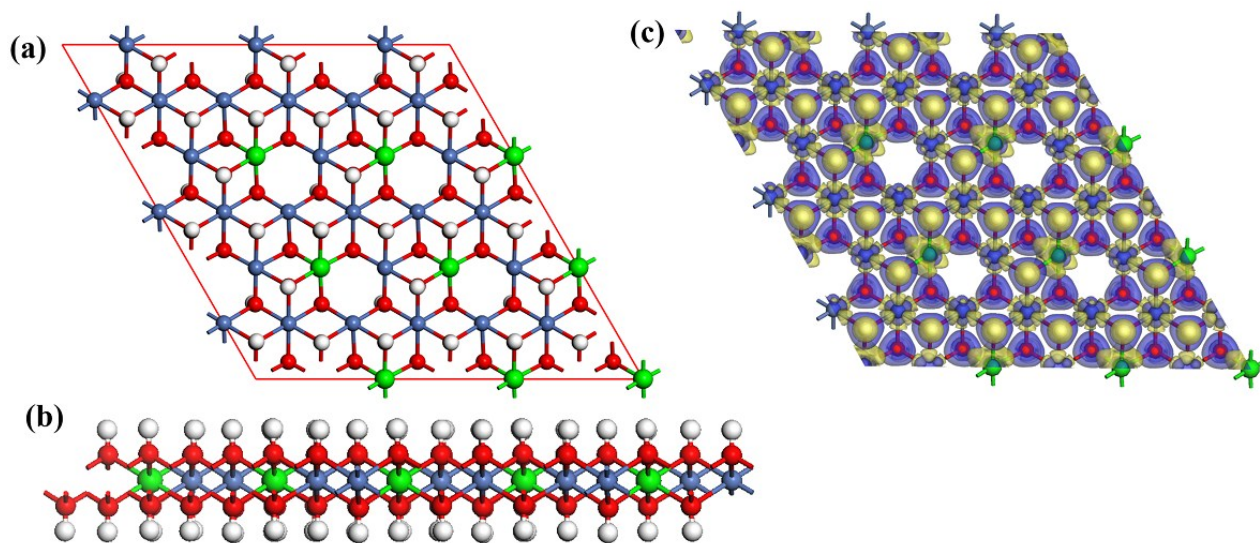

**Fig. S17** Atomic structure model and theoretical calculation analysis of the catalysts: (a) Top view and (b) side view of the model structure of NiFe LDH-V<sub>O</sub>, (c) corresponding 3D charge distributions.

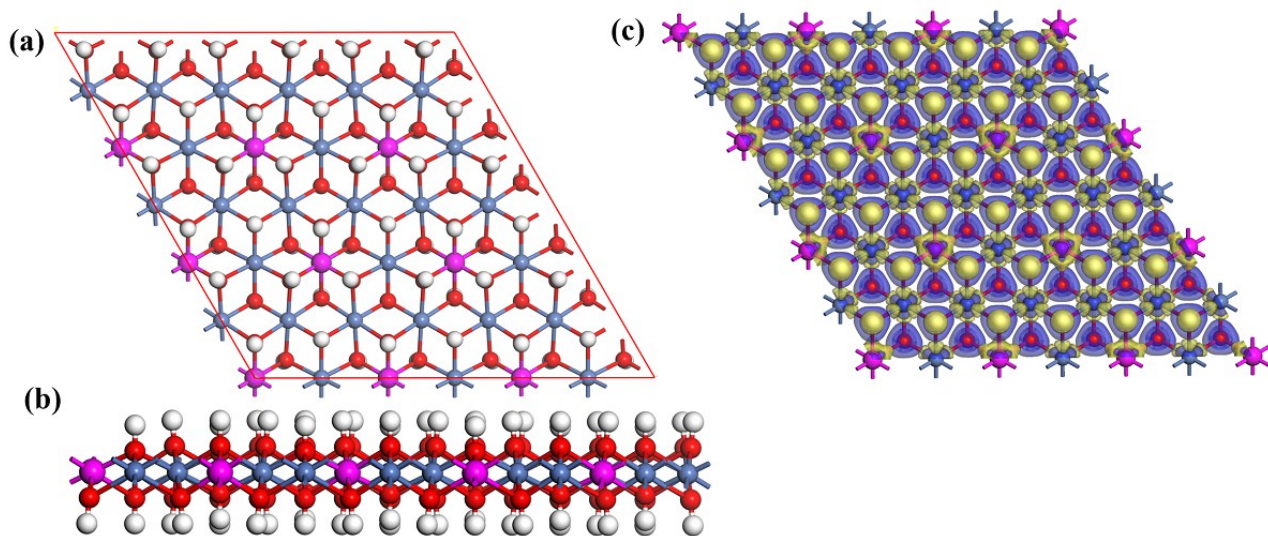

**Fig. S18** Atomic structure model and theoretical calculation analysis of the catalysts: (a) Top view and (b) side view of the model structure of NiCo LDH, (c) corresponding 3D charge distributions.

**Table S1.** The comparison of OER performance with state-of-the-art electrocatalysts.

| Materials                                     | Supports | Electrolytes | $E_{J=10 \text{ mA cm}^{-2}}$ (V) | References |
|-----------------------------------------------|----------|--------------|-----------------------------------|------------|
| NiCo LDH@ZIF-67-V <sub>O</sub> /NF            | Ni foam  | 1 M KOH      | 1.52                              | This work  |
| NiCo LDH@ZIF-67/NF                            | Ni foam  | 1 M KOH      | 1.56                              | This work  |
| Ni LDH@ZIF-67-V <sub>O</sub> /NF              | Ni foam  | 1 M KOH      | 1.59                              | This work  |
| Ni LDH@ZIF-67/NF                              | Ni foam  | 1 M KOH      | 1.615                             | This work  |
| NiFe LDH@ZIF-67-V <sub>O</sub> /NF            | Ni foam  | 1 M KOH      | 1.56                              | This work  |
| NiFe LDH@ZIF-67/NF                            | Ni foam  | 1 M KOH      | 1.595                             | This work  |
| CoO <sub>x</sub> -ZIF                         | -        | 1 M KOH      | 1.548                             | 1          |
| NiFe LDH/NiCo <sub>2</sub> O <sub>4</sub> /NF | Ni foam  | 1 M KOH      | 1.57                              | 2          |
| Ni(OH) <sub>2</sub> /NF                       | Ni Foam  | 1 M KOH      | 1.58                              | 3          |
| NiFe LDH                                      | Ni Foam  | 1 M KOH      | 1.545                             | 4          |
| NiCo LDH                                      | CFP      | 1 M KOH      | 1.597                             | 5          |
| NiFe/NiCo <sub>2</sub> O <sub>4</sub> /NF     | Ni Foam  | 1M KOH       | 1.57                              | 6          |

**Table S2.** BET surface areas, and BJH pore volume of the samples.

| Sample                         | S <sub>BET</sub> (m <sup>2</sup> g <sup>-1</sup> ) | Pore Volume (cm <sup>3</sup> g <sup>-1</sup> ) |
|--------------------------------|----------------------------------------------------|------------------------------------------------|
| Ni LDH@ZIF-67-V <sub>O</sub>   | 127                                                | 0.390                                          |
| NiFe LDH@ZIF-67-V <sub>O</sub> | 131                                                | 0.413                                          |
| NiCo LDH@ZIF-67-V <sub>O</sub> | 138                                                | 0.427                                          |

**Table S3.** The atomic ratio of Ni<sub>8</sub>Co<sub>2</sub> LDH@ZIF-67-V<sub>O</sub>/NF, Ni<sub>5</sub>Co<sub>5</sub> LDH@ZIF-67-V<sub>O</sub>/NF and Ni<sub>3</sub>Co<sub>7</sub> LDH@ZIF-67-V<sub>O</sub>/NF samples.

| Sample                                                        | Atomic concentration (%) |      |       |      |      |
|---------------------------------------------------------------|--------------------------|------|-------|------|------|
|                                                               | C                        | N    | O     | Ni   | Co   |
| Ni <sub>8</sub> Co <sub>2</sub> LDH@ZIF-67-V <sub>O</sub> /NF | 38.71                    | 3.92 | 47.59 | 7.86 | 1.92 |
| Ni <sub>5</sub> Co <sub>5</sub> LDH@ZIF-67-V <sub>O</sub> /NF | 37.98                    | 4.01 | 48.20 | 4.89 | 4.92 |
| Ni <sub>3</sub> Co <sub>7</sub> LDH@ZIF-67-V <sub>O</sub> /NF | 39.52                    | 3.95 | 46.53 | 2.98 | 7.02 |

## References

- 1 S. Dou, C. L. Dong, Z. Hu, Y. C. Huang, J. L. Chen, L. Tao, D. F. Yan, D. W. Chen, S. H. Shen, S. L. Chou, and S. Y. Wang, *Adv. Funct. Mater.*, 2017, **27**, 1702546.
- 2 Z. Wang, S. Zeng, W. Liu, X. Wang, Q. Li, Z. Zhao, F. Geng, *ACS Appl. Mater. Interfaces*, 2017, **9**, 1488-1495.
- 3 J. Lee, G. H. Lim, B. Lim, *Chem. Phys. Lett.*, 2016, **644**, 51-55.
- 4 N. Han, F. Zhao, Y. Li, *J. Mater. Chem. A*, 2015, **3**, 16348-16353.
- 5 H. Liang, F. Meng, M. Caban-Acevedo, L. Li, A. Forticaux, L. Xiu, Z. Wang, S. Jin, *Nano Lett.*, 2015, **15**, 1421-1427.
- 6 C. Xiao, Y. Li, X. Lu, C. Zhao, *Adv. Funct. Mater.*, 2016, **26**, 3515-3523.
